# Supplementary figures and images for: Halogen substitution as an efficient tool to increase the near-infrared photoluminescence intensity of erbium(iii) quinolinates in non-deuterated DMSO
Source: Royal Society of Chemistry journal article supplement (doi:10.1039/b304491b), 2003-01-01

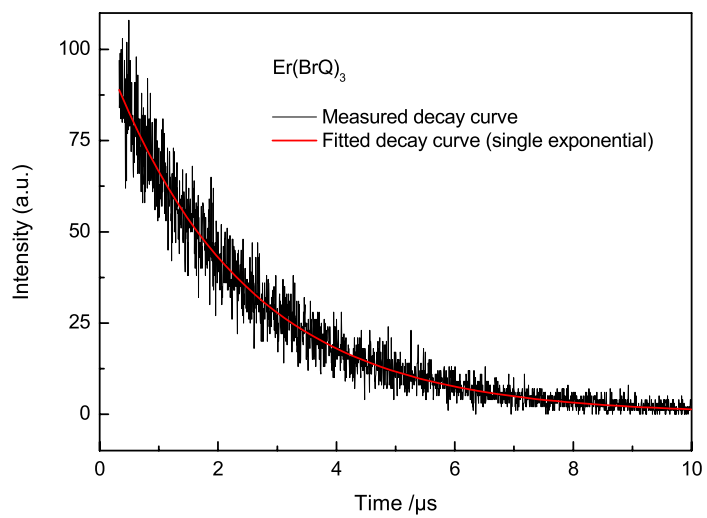

Supplement: esi.pdf [file esi.pdf]
